1  
2  
3  
4  
5  
6  
7  
8  
9  
10  
11  
12  
13  
14  
15  
16  
17  
18  
19  
20  
21  
22  
23  
24  
25  
26  
27  
28  
29  
30  
31

**RodZ promotes MreB polymer formation and curvature localization to  
determine the cylindrical uniformity of *E. coli* shape**

Randy M. Morgenstein<sup>\*#1,2</sup>, Benjamin P. Bratton<sup>\*2,3</sup>, Joshua W. Shaevitz<sup>3</sup>, and  
Zemer Gitai<sup>#2</sup>

<sup>1</sup> Department of Microbiology and Molecular Genetics, Oklahoma State University

<sup>2</sup> Department of Molecular Biology, Princeton University

<sup>3</sup> Department of Physics and Lewis Sigler Institute for Integrative Genomics,  
Princeton University

\* These authors contributed equally

# Please send correspondence to [randy.morgenstein@okstate.edu](mailto:randy.morgenstein@okstate.edu) or  
[zgitai@princeton.edu](mailto:zgitai@princeton.edu)

32

## 33 **Abstract**

34 Cell shape in bacteria is determined by the cell wall, which is synthesized  
35 by a variety of proteins whose actions are coordinated by the actin-like MreB  
36 protein. MreB uses local geometric cues of envelope curvature to avoid the cell  
37 poles and localize to specific regions of the cell body. However, it remains  
38 unclear whether MreB's curvature preference is regulated by additional factors,  
39 and which features of MreB are essential for specific aspects of rod shape  
40 growth, such as cylindrical uniformity. Here we show that in addition to its  
41 previously-described role in mediating MreB motion, RodZ also modulates MreB  
42 polymer number and curvature preference. MreB polymer number and curvature  
43 localization can be regulated independently. Quantitative 3D measurements and  
44 a series of mutant strains show that among various properties of MreB, polymer  
45 number, total length of MreB polymers, and MreB curvature preference are the  
46 key determinants of cylindrical uniformity, a measure of the variability in radius  
47 within a single cell. Changes in the values of these parameters are highly  
48 predictive of the resulting changes in cell shape ( $r^2=0.93$ ). Our data suggest a  
49 model for rod shape in which RodZ promotes the assembly of multiple long MreB  
50 polymers that ensure the growth of a uniform cylinder.

51

## 52 **Introduction**

53 Understanding how cells encode the ability to robustly determine their own  
54 shapes remains one of the central mysteries of cell biology. In bacteria, the  
55 peptidoglycan cell wall (PG) forms a rigid structure whose shape dictates the  
56 shape of the cell. When purified, the extracted PG maintains the cell's original  
57 shape and loss of PG causes cells to lose their shapes, e.g., rod-shaped bacteria  
58 becoming round<sup>1-3</sup>. These cells can then reestablish cell shape *de novo* once cell  
59 wall synthesis is restored<sup>2</sup>. In this work, we focus on the gram-negative rod-  
60 shaped bacterium *Escherichia coli*. Despite their relative simplicity, there are  
61 multiple parameters that describe a population of rod like cells including: a  
62 straight cylindrical axis with high uniformity of the diameter (which we term

63 cylindrical uniformity), center-line straightness (bent vs straight rod), the  
64 distribution of cell widths and lengths within the population, and the geometry of  
65 the poles. Previously we studied the determinants of *E. coli* straightening and  
66 population-average width, but the determinants of single-cell cylindrical uniformity  
67 remain unclear<sup>2,4,5</sup>.

68 Computational modeling has shown that rod shape can be established  
69 and maintained by directing the insertion of new cell wall material in an organized  
70 fashion<sup>6,7</sup>. If cell wall synthesis occurs randomly throughout the cell, the cell  
71 becomes unstable and defects become amplified, leading to a loss of rod shape.  
72 In *E. coli*, the bacterial actin homolog MreB organizes cell wall insertion by  
73 localizing to regions of the cell with particular geometric curvatures and recruiting  
74 cell wall enzymes to direct growth to those sites<sup>2,4</sup>. However, it remains unknown  
75 whether accessory proteins regulate MreB assembly or curvature-preference.  
76 Furthermore, it remains unclear which combination of MreB's properties are  
77 necessary to direct specific aspects of rod shape formation.

78 In *E. coli*, cell wall insertion is localized to the main body of the cell, with  
79 no growth at the poles where the cell wall remains inert<sup>8</sup>. The lack of cell wall  
80 insertion at the poles can be explained by geometric exclusion of MreB, which  
81 directs the locations of cell wall insertion<sup>4</sup>. Because the cell poles are much more  
82 curved than the rest of the cell and MreB is excluded from regions with such  
83 curvature, sensing cell curvature is a powerful way for MreB to recognize and  
84 avoid the poles. However, the scale of cellular curvature is much larger than that  
85 of a single protein, making it difficult for monomeric proteins to detect the  
86 difference between polar and mid-cell geometry<sup>6,9</sup>. To overcome this problem,  
87 MreB has been proposed to form cellular-scale polymers, whose assembly has  
88 been observed both *in vivo* and *in vitro*<sup>10-13</sup>.

89 MreB polymers serve multiple roles in cell shape determination. First,  
90 elongated polymers can coordinate the activity of multiple cell-wall modulating  
91 enzymes to produce twisting cylindrical growth<sup>14</sup>. Second, the orientation of MreB  
92 polymers relative to the cell axis helps determine the average cell width of the  
93 population<sup>5</sup>. Lastly, MreB polymers allow these nano-scale proteins to form

94 micron-scaled structures that can sense membrane curvature differences  
95 between the poles and main cell body. More specifically, *in vivo* localization  
96 studies show that MreB is depleted from the poles and is enriched at areas of low  
97 or negative mean curvature<sup>4</sup>. *In vitro*, MreB filaments can bend a membrane  
98 vesicle and molecular dynamics simulations suggest that MreB polymers have an  
99 intrinsic bend<sup>11,15</sup>. We previously analyzed the properties of MreB that correlate  
100 with the population-level average width of the cell and found that MreB polymer  
101 angle correlates with average cell width<sup>5</sup>. However, previous studies have not  
102 examined the MreB properties coupled to the ability to form an elongated  
103 cylindrical rod-like cell in the first place.

104 Several toxins have been proposed to target MreB under conditions of  
105 stress<sup>16-18</sup>, but it remains unclear whether MreB assembly or curvature  
106 localization are normally regulated *in E. coli*. RodZ is a transmembrane protein  
107 (Fig. 1A) that is co-conserved with MreB<sup>19</sup> and is one of the few proteins that  
108 definitively binds MreB, *in vitro* by co-crystallization and *in vivo* by bimolecular  
109 fluorescence complementation (BiFC)<sup>1,20</sup>. We previously showed that RodZ  
110 functions downstream of MreB as an adaptor that causes MreB to rotate around  
111 the cell circumference; RodZ couples cytoplasmic MreB to the periplasmic  
112 activity of cell wall synthesis<sup>1</sup>. This dynamic rotation promotes robust rod shape  
113 in the presence of cell wall stress.

114 Here we show that in addition to its role in promoting MreB rotation, RodZ  
115 is also a key regulator of MreB assembly and curvature preference. These  
116 functions require both the cytoplasmic and periplasmic domains of RodZ,  
117 indicating that RodZ functions as a key hub to integrate information across the  
118 inner membrane and organize cell shape. Using three-dimensional (3D) imaging  
119 and a combination of *mreB* and *rodZ* mutants, we go on to explore which of the  
120 many properties of MreB are important for cylindrical uniformity. We find that  
121 curvature preference is necessary but not sufficient to grow cylindrically uniform  
122 cells, while a combination of MreB polymer number, total polymer length, and  
123 curvature preference accurately predict changes in cylindrical uniformity.

124

125 **Results**

126 ***RodZ is required for MreB curvature localization.***

127 We recently showed that the transmembrane protein RodZ interacts with both  
128 MreB and the cell wall synthesis machinery to couple MreB rotation to cell wall  
129 synthesis<sup>1</sup>. RodZ is necessary for MreB rotation and specific point mutations in  
130 *mreB* can roughly restore rod-like shape without restoring MreB rotation<sup>1</sup>. While  
131 these data indicated that MreB rotation is not necessary for rod shape, the  
132 resulting cells had an irregular morphology distinct from wild-type (WT) cells,  
133 suggesting that RodZ could play an important role in the cylindrical uniformity of  
134 cell shape independently of its role in MreB rotation. Consequently, we examined  
135 the role of RodZ in controlling the biophysical properties of MreB that are thought  
136 to be important for shape determination, like curvature preference.

137 To quantify the effect of RodZ on MreB curvature preference we  
138 measured the 3D cell shape and curvature enrichment of MreB in a strain  
139 expressing MreB-GFP<sup>sw</sup> (internal msGFP sandwich fusion) as the sole copy of  
140 MreB (Fig. 1B). We previously showed that this fusion fully complements the  
141 shape of WT *E. coli* under a wide range of conditions<sup>5</sup> and all mutants described  
142 below were generated in this strain background. Generating 3D cell-shape  
143 reconstructions with roughly 50 nm precision from the raw fluorescence images  
144 allowed us to calculate the Gaussian curvature, which is the product of the two  
145 principal curvatures, at every location on the 3D surface of the cell<sup>21</sup>. These two  
146 principal curvatures can only be measured in 3D. Previously we reported MreB's  
147 curvature preference as a function of mean curvature, the average of the two  
148 principal curvatures. Mean curvature is sensitive to global properties such as cell  
149 size, whereas Gaussian curvature enables us to focus on the local curvature  
150 geometry, which is particularly important in irregularly-shaped cells such as  
151  $\Delta$ *rodZ* mutants. MreB was enriched at Gaussian curvatures near zero and  
152 strongly depleted from regions with positive curvature (Fig 1CD). Cell poles have  
153 a positive Gaussian curvature since each of the principal curvatures at the pole  
154 have the same sign, while cylinders have a Gaussian curvature of zero owing to  
155 the lack of curvature along the cell axis. Thus, MreB's curvature preference

156 nicely parallels the pattern of *E. coli* growth during elongation, localizing to  
157 cylindrical regions and avoiding the poles.

158 Interestingly, we found that deletion of *rodZ* strongly reduced the curvature  
159 preference of MreB (Fig. 1CD). In  $\Delta rodZ$  cells, MreB is no longer enriched near  
160 zero Gaussian curvature or excluded from the poles. The shape of  $\Delta rodZ$  cells  
161 can be complemented by expressing full-length RodZ from a plasmid (RodZ<sub>1-337</sub>).  
162 RodZ<sub>1-337</sub> also restores both the depletion of MreB from regions of positive  
163 Gaussian curvature and the enrichment of MreB in regions of negative Gaussian  
164 curvature. These cells lacked the peak in MreB enrichment near zero Gaussian  
165 curvature noticeable in WT cells (Fig. 2A). The cells we studied do not display  
166 much negative Gaussian curvature so the fact that cell shape was similar in WT  
167 and RodZ<sub>1-337</sub> led us to define the important features of WT-like curvature  
168 preference as enriched at negative and slightly positive Gaussian curvatures and  
169 depleted at strongly positive Gaussian curvatures.

170 Because  $\Delta rodZ$  disrupts both curvature localization and rod shape, we  
171 sought to determine if it is possible for MreB to sense curvature in other round  
172 cells. We thus grew WT cells in sub-lethal concentrations of the PBP2-inhibiting  
173 drug, mecillinam. PBP2 acts downstream of MreB, such that we predicted that  
174 PBP2 inhibition would round cells without disrupting MreB's curvature  
175 preference. Additionally, cells were imaged in the absence of mecillinam. We  
176 found that in non-rod shaped mecillinam-treated cells, MreB maintained a  
177 preference for Gaussian curvatures near and below zero and an avoidance of  
178 positive Gaussian curvature (Fig. S1A-C). Because both mecillinam-treated cells  
179 and  $\Delta rodZ$  cells lack rod-like shape but only  $\Delta rodZ$  cells lack geometrically  
180 localized MreB, the lack of MreB enrichment in  $\Delta rodZ$  must not be a failure in our  
181 3D analysis. These data show that RodZ specifically promotes MreB's curvature  
182 localization in a manner that is not merely secondary to its role in cell shape  
183 determination.

184

185 ***The cytoplasmic domain of RodZ modulates MreB curvature localization.***

186 RodZ is a transmembrane protein with a large periplasmic domain and a smaller  
187 cytoplasmic domain (Fig. 1A). We hypothesized that these two domains of RodZ  
188 could play distinct roles, with the periplasmic domain binding the PG synthesis  
189 machinery to promote MreB rotation, and the cytoplasmic domain binding MreB  
190 to promote its curvature preference. In order to determine how RodZ regulates  
191 MreB curvature localization, we thus examined MreB curvature enrichment in  
192 RodZ truncations from both its periplasmic and cytoplasmic termini.

193 Consistent with our hypothesis, we found that the periplasmic domain  
194 plays little role in modulating MreB's curvature preference (Fig. 1D) even though  
195 it is necessary for cell shape<sup>1,12,22</sup>. For example, the curvature localization of  
196 RodZ<sub>1-155</sub> is largely indistinguishable from that of RodZ<sub>1-337</sub>, and RodZ<sub>1-142</sub> retains  
197 the overall WT-like pattern of localization. Even after deleting the entire  
198 periplasmic domain along with the transmembrane domain (RodZ<sub>1-111</sub>), there is  
199 still a noticeable enrichment around zero Gaussian curvature and a steady  
200 decline in enrichment as the Gaussian curvature becomes more positive. This  
201 indicates that even when RodZ is not in the membrane, its cytoplasmic domain  
202 can influence MreB's curvature preference. Unlike the membrane-bound  
203 periplasmic truncations (RodZ<sub>1-155</sub> and RodZ<sub>1-142</sub>), a small truncation in the RodZ  
204 cytoplasmic domain (RodZ<sub>59-337</sub>) shows a clear change in MreB curvature  
205 preference with both a decreased enrichment near zero and less of a depletion  
206 from regions with positive Gaussian curvature (Fig. 1C) and a concurrent loss of  
207 cell shape (Fig. S2C-E). Additional truncations (RodZ<sub>70-337</sub>) and deletion of the  
208 entire helix-turn-helix motif (RodZ<sub>83-337</sub>) show a further dampening of the  
209 curvature enrichment profile. While they fail to complement MreB curvature  
210 localization, cytoplasmic truncations do generate different cell shapes,  
211 suggesting that these truncations are being stably expressed. For all of the  
212 Gaussian curvature preference measurements reported in this study, we take  
213 into account the distributions of curvatures observed such that changes in  
214 curvature preference are not due to changes in the available curvatures in the  
215 cell (Fig. S1-S3).

216

217 ***Rod-shaped cells have WT-like MreB localization but WT-like MreB***  
218 ***localization is not sufficient for proper cell shape***

219 Deleting *rodZ* results in a loss of cylindrical uniformity that can be suppressed by  
220 a point mutant in *mreB* (MreB<sub>S14A</sub>) without restoring MreB rotation<sup>1,23</sup>. Because  
221 RodZ is needed for MreB's proper curvature localization, we determined whether  
222 MreB<sub>S14A</sub> can also suppress the loss of MreB's curvature enrichment in the  
223 absence of *rodZ*. In contrast to its effects on MreB rotation, the curvature  
224 enrichment profile of MreB<sub>S14A</sub> was restored to a WT-like profile in  $\Delta rodZ$  cells  
225 (enriched near zero, a sharp decline toward positive curvatures, and depleted at  
226 strongly positive Gaussian curvature, Fig. 2AB).

227 To test whether the correlation between shape and MreB localization  
228 observed for MreB<sub>S14A</sub>  $\Delta rodZ$  is generalizable, we examined additional MreB  
229 point mutations that were originally identified as resistant to an MreB targeting  
230 drug, A22, and previously characterized<sup>5</sup>. We confirmed that the steady state  
231 levels of MreB are not dramatically affected by these point mutations in the  
232 presence or absence of *rodZ* (Fig. S4). MreB<sub>E143A</sub> had little to no effect on MreB  
233 localization in the presence of RodZ while MreB<sub>E143A</sub>  $\Delta rodZ$  restored MreB  
234 localization to a WT-like profile (Fig. 2AB). Despite their qualitatively similar MreB  
235 curvature enrichment profiles, MreB<sub>S14A</sub>  $\Delta rodZ$  formed rods that closely  
236 resembled WT cells while MreB<sub>E143A</sub>  $\Delta rodZ$  cells were more irregular (Fig. 2B,  
237 Table S4). Analysis of another point mutant, MreB<sub>Y183N</sub>, reinforced the conclusion  
238 that proper curvature localization is insufficient for proper rod shape (Fig. S5).  
239 MreB<sub>Y183N</sub> failed to form rods, in the presence of RodZ, despite displaying a WT-  
240 like pattern of MreB localization (Fig. 2C). Thus, all the rod-shaped cells we  
241 analyzed have geometrically-localized MreB, but not all cells with geometrically-  
242 localized MreB form rods.

243

244 ***RodZ modulates the number of MreB polymers.***

245 Given that RodZ promotes both MreB rotation and curvature preference,  
246 we sought to determine if there are additional properties of MreB under RodZ  
247 control. Specifically, our 3D analysis enabled us to determine MreB polymer



248 length, number, angle with respect to the long cell axis, and fraction of  
249 membrane-associated protein. Comparing cells with and without RodZ, we  
250 observed that there were not substantial changes in polymer length (Fig. 3) or  
251 average polymer angle (Fig. S4A). There was a statistically-significant change in  
252 the fraction of MreB associated with the cell periphery (Fig. S4D), but this change  
253 was small (~5%) and also observed in mecillinam-rounded cells, such that it does  
254 not appear to be a major component of RodZ's influence on MreB. We note that  
255 our forward convolution method<sup>5</sup> can accurately identify the presence of  
256 polymers regardless of their length and can determine the length of polymers  
257 greater than 200 nm. Thus, we can calculate the average MreB polymer length  
258 for the ~60% of polymers that are longer than 200nm. When these MreB  
259 polymers are measured in strains with or without RodZ, there is not a significant  
260 difference in the average MreB polymer length (WT= 515 ± 15 nm,  $\Delta rodZ$ = 509 ±  
261 18 nm) (Fig. 3B), nor in the fraction of detected structures >200nm (57%, 59%).

262 While RodZ does not influence all aspects of MreB polymers, we observed  
263 a dramatic decrease in total MreB polymer number per cell (including those  
264 <200nm) in the absence of RodZ (WT= 11.6 ± 0.5,  $\Delta rodZ$ = 6.6 ± 0.3) (Fig. 3C).  
265 The change in polymer number in  $\Delta rodZ$  cells cannot be attributed to changes in  
266 cell shape as mecillinam treatment led to round cells without a concurrent  
267 decrease in polymer number (polymer numbers actually increased in these cells,  
268 (Fig. S1D). Furthermore, we binned both WT and  $\Delta rodZ$  cells by volume and  
269 found that in cells of similar volume  $\Delta rodZ$  had fewer MreB polymers and lacked  
270 WT-like geometrically-localized MreB (Fig. S6). Thus, while cell volume does  
271 affect polymer number, RodZ increases the number of polymers and promotes  
272 curvature localization independently of its effect on cell size and shape.

273 To further dissect the role of RodZ in assembling MreB polymers, we  
274 examined the average polymer number in cells with RodZ truncation mutants.  
275 Because MreB curvature localization is more dependent on the cytoplasmic  
276 domain of RodZ than its periplasmic domain and MreB binds RodZ in the  
277 cytoplasm, we hypothesized that this domain would also control MreB polymer  
278 number. As expected, deletion of the cytoplasmic domain of RodZ resulted in a

279 decrease of the number of MreB polymers per cell (Fig. 3D). Surprisingly, we  
280 also saw a dramatic reduction in the number of MreB polymers per cell when we  
281 truncated the periplasmic domain of RodZ (Fig. 3E). Since the periplasmic  
282 domain of RodZ is needed to interact with the cell wall synthesis machinery,  
283 these data suggest RodZ could integrate signals from the process of cell growth  
284 to feed back on MreB and control polymer number.

285 We also compared MreB polymer properties in MreB point mutants with or  
286 without *rodZ*. We found that specific point mutations altered specific properties of  
287 MreB. For example, MreB<sub>E143A</sub> polymers are longer than WT but have the same  
288 MreB polymer angle, while MreB<sub>S14A</sub> polymers are the same length as WT but the  
289 polymer angle is different (Fig. 3A and S4). Interestingly, when comparing  
290 MreB<sub>S14A</sub> in the presence or absence of RodZ, MreB<sub>S14A</sub> suppressed the RodZ-  
291 dependent properties of MreB (curvature localization, polymer number, and  
292 membrane-association) (Fig. 3A and S4). MreB<sub>S14A</sub> was also the strongest  
293 suppressor of  $\Delta rodZ$  cell shape, suggesting that MreB<sub>S14A</sub> functionally restores a  
294 majority of the effect of the WT MreB-RodZ interaction. In contrast, MreB<sub>E143A</sub>, a  
295 partial suppressor of  $\Delta rodZ$  cell shape, suppresses the effects of RodZ on MreB  
296 curvature localization but does not suppress the effects of RodZ on MreB  
297 polymer number or membrane fraction. MreB<sub>E143A</sub> also has longer polymers than  
298 MreB<sub>WT</sub> and the length of these polymers increases in the absence of RodZ.  
299 Together our results suggest that the different properties of MreB can be  
300 modulated independently.

301

302 ***Cells need multiple, long, and geometrically-localized MreB polymers to***  
303 ***grow as uniform rods.***

304 Because MreB curvature preference did not always correlate with  
305 cylindrical uniformity and MreB parameters can be independently controlled, we  
306 sought to determine which properties of MreB best predict cylindrical uniformity.  
307 To this end we quantified cell shape and compared MreB properties across a  
308 large set of *mreB* and *rodZ* mutants (Supplemental Table 4-mutants and  
309 properties). To quantify cylindrical uniformity we relied on our previous analysis<sup>1</sup>

310 showing that the variation of cell diameter within a single cell (intracellular  
311 diameter deviation, IDD) is a quantitative measure of cylindrical uniformity (Fig.  
312 S7). We confirmed that the IDD measured from 3D reconstructions also shows a  
313 clear separation between cells that are qualitatively classified as uniform rods,  
314 irregular rods, and round cells (note that IDD is inversely related to cylindrical  
315 uniformity, Fig. S7). We then built a collection of shape comparisons by  
316 computing the difference in IDD between two strains ( $\Delta\text{IDD} = \text{IDD}_{\text{strain1}} -$   
317  $\text{IDD}_{\text{strain2}}$ ) (Table 1). Using this nomenclature, a positive  $\Delta\text{IDD}$  describes a  
318 comparison where cells of strain 1 are more irregular in their shape than cells of  
319 strain 2. For example,  $\Delta\text{rodZ}$  cells have a  $\Delta\text{IDD}$  of +0.1 when compared to WT  
320 cells ( $\Delta\text{IDD} = \text{IDD}_{\Delta\text{rodZ}} - \text{IDD}_{\text{WT}}$ ). We note that in all cases we computed a  $\Delta\text{IDD}$   
321 value that compares two strains with one change, either comparing the same  
322 genetic background with or without *rodZ* to assess the impact of RodZ, or  
323 comparing WT to different alleles of *mreB* to assess the impact of specific  
324 changes to MreB. In addition to  $\Delta\text{IDD}$ , we computed the change in MreB  
325 parameters for these same comparisons, choosing as our input a wide variety of  
326 scalar quantities (average polymer length, number of polymers, polymer angle,  
327 fraction of MreB on the membrane, etc.) and versions of these normalized by the  
328 surface area or volume. For the non-scalar metric (curvature localization), we  
329 distilled the curvature enrichment profiles into multiple scalars, including the  
330 average of the enrichment value for Gaussian curvatures below and above 2  
331  $\mu\text{m}^2$ . For a complete list of MreB parameters quantified, see Supplement Table  
332 2.

333 To identify the MreB parameters that were most predictive of changes in  
334 cylindrical uniformity we performed a LASSO (Least Absolute Shrinkage and  
335 Selection Operator) regression<sup>24</sup>. LASSO is a machine learning method that  
336 involves penalizing the absolute size of the regression coefficients. The result is  
337 the smallest model within one standard error of the mean of the minimum LASSO  
338 regression. Because we did not know *a priori* whether measurements should be  
339 normalized per cell, per volume, or per surface area, we used all three  
340 normalizations as inputs into the LASSO regression. Combining all of our data,

341 our LASSO analysis resulted in a model with four non-zero terms. These four  
342 terms included measures of polymer number, length, and curvature localization  
343 with different normalizations. However, a leave-one-out analysis of the data  
344 revealed that this was an over fit model (Table S2). To determine which version  
345 of normalization was most predictive across different subsampled datasets, we  
346 used two different analysis methods (see Materials and Methods). Both methods  
347 converged on the same terms: MreB enrichment in regions of low Gaussian  
348 curvature ( $<2 \mu\text{m}^{-2}$ ), the total length of MreB polymer in each cell normalized by  
349 cell volume, and the number of polymers per cell (Fig. 4, Table S2). The  
350 combination of these three parameters was very predictive of the change in cell  
351 shape ( $r^2=0.93$ ), significantly more than any one parameter alone ( $r^2=0.49$  (total  
352 polymer length), 0.68 (polymer number), and 0.52 (curvature localization)) (Fig  
353 4AB). Importantly, this correlation holds for strain comparisons that have a  
354 positive or negative  $\Delta\text{IDD}$  due to truncations in RodZ or MreB point mutations  
355 (Fig. 4A).

356 The LASSO regression considers the correlations among MreB properties  
357 and cell size in order to identify the features of MreB that should be predictive of  
358 corresponding changes in cylindrical uniformity (IDD). We thus sought to  
359 experimentally test whether the LASSO regression's result, that changing  
360 specific MreB properties, like polymer number, should result in a predictable  
361 change in IDD. Because MreB<sub>E143A</sub> is able to maintain WT-like MreB curvature  
362 localization even in the absence of *rodZ*, this particular mutant enabled us to test  
363 our hypothesis. Specifically, we found that ectopic expression of MreB<sub>E143A</sub> in a  
364 MreB<sub>E143A</sub>  $\Delta\text{rodZ}$  background increased MreB polymer number (Fig. S8).  
365 Importantly, we observed the LASSO-predicted change in shape upon increasing  
366 MreB polymer number, as ectopic expression of MreB<sub>E143</sub> made the cells more  
367 rod-like, even though *rodZ* was still absent (Fig. S8, Fig. 4A, Table 1). We also  
368 ectopically expressed MreB<sub>WT</sub> in a MreB<sub>WT</sub>  $\Delta\text{rodZ}$  background, which is not  
369 properly curvature-localized. This strain did not restore rod shape, confirming that  
370 the MreB<sub>E143</sub> effect is not a generic consequence of ectopic expression (Fig. S8).  
371 These results support our conclusion that MreB-dependent uniform rod shape

372 requires the presence of multiple polymers that are geometrically-localized and  
373 collectively long.

374

## 375 **Discussion**

376 Our findings demonstrate that RodZ plays a central role in regulating both  
377 MreB's localization to curved subcellular regions and the number of MreB  
378 polymers per cell. This RodZ-mediated regulation also revealed that MreB  
379 curvature preference is necessary but not sufficient for cylindrical uniformity, and  
380 that cylindrical uniformity requires the presence of multiple long polymers of  
381 MreB. Below we discuss the implications of RodZ's function as an MreB  
382 interaction partner. We also present a model in which distinct aspects of MreB  
383 control distinct aspects of rod shape determination including rod initiation<sup>2</sup>,  
384 centerline curvature<sup>4,7</sup> (modulated by MreB curvature localization), cell width  
385 determination (modulated by MreB angle)<sup>5</sup>, and now, in this current work,  
386 cylindrical uniformity (modulated by multiple factors).

387

### 388 ***RodZ regulates MreB polymer number, localization, and movement***

389 We previously showed that the transmembrane protein RodZ binds to  
390 MreB in the cytoplasm and cell wall synthesis enzymes in the periplasm to  
391 couple MreB to cell wall insertion, thereby driving MreB rotation<sup>1</sup>. Here we  
392 demonstrate two additional functions for RodZ in regulating MreB curvature  
393 preference and polymer number. Using 3D imaging, we show that MreB localizes  
394 to areas near zero Gaussian curvature, which causes it to become enriched in  
395 the cylindrical region of the cell and avoid the cell poles whose Gaussian  
396 curvature is positive. *In vitro* and *in silico* data indicate that MreB polymers have  
397 an intrinsic curvature, suggesting that MreB filaments could potentially sense  
398 curvatures on their own<sup>9,11,15</sup>. However, our data show that *in vivo*, *E. coli* MreB<sub>WT</sub>  
399 polymers require RodZ to properly sense cell curvature. Nevertheless, RodZ is  
400 not absolutely required for curvature localization as some MreB point mutants  
401 can localize in a WT-like pattern even in the absence of RodZ. Understanding the  
402 molecular mechanism by which RodZ influences MreB curvature localization will

403 require *in vitro* systems that are currently unavailable. Since RodZ reaches  
404 around the MreB polymer and binds it on the side opposite the membrane<sup>20</sup>, we  
405 speculate that the binding of RodZ could modulate the intrinsic curvature of  
406 MreB<sup>6</sup>. RodZ could also function to rigidify MreB polymers such that the absence  
407 of RodZ would cause MreB polymers to become more flexible, allowing them to  
408 bend more freely and therefore bind to a wider array of curvatures.

409 The second new role we discovered for RodZ is in regulating MreB  
410 polymer number. Previously, we had attributed changes in polymer number to  
411 changes in cell volume<sup>5</sup>. However, mutations in *rodZ* provided a shape-  
412 independent way to modulate polymer number, enabling us to conclude that  
413 polymer number promotes cylindrical uniformity independently of cell volume.  
414 There are several mechanisms by which RodZ could increase MreB polymer  
415 number. For example, RodZ could function as a nucleator that stimulates the  
416 formation of new polymers, as a severing protein that cuts single polymers into  
417 two separate polymers, or as a capping factor that limits polymer growth. We  
418 note that a simple polymer stabilization mechanism is unlikely because that  
419 would have led to significantly-increased polymer length. Regardless of the  
420 mechanistic details, whose dissection will require future *in vitro* studies, our  
421 findings represent the first identification of a factor that enhances MreB polymer  
422 formation.

423 Interestingly, our RodZ truncation and MreB mutant analyses suggest that  
424 the functions of RodZ in promoting MreB rotation, polymer formation, and  
425 geometric localization are genetically separable. Thus, RodZ appears to use its  
426 cytoplasmic and periplasmic domains to coordinate multiple aspects of MreB,  
427 including acting upstream of MreB assembly to regulate its polymer properties  
428 and downstream of MreB assembly to regulate its coupling to the movement of  
429 the cell wall synthesis machinery. Such modularity in a transmembrane protein is  
430 an appealing way for the cell to tune the properties of MreB, perhaps enabling  
431 optimization of MreB in response to different growth conditions.

432

433 ***Cylindrical uniformity requires multiple long and curvature-localized***  
434 ***polymers***

435 In previous studies, our lab and others determined that MreB mediates  
436 multiple aspects of rod shape determination<sup>1,2,4,5</sup>. MreB localization helps  
437 straighten rods and initiate new rods out of spheres, while MreB angle is  
438 correlated with the average width of a rod<sup>2,5</sup>, even in the absence of RodZ (Fig.  
439 S9). Here we show that MreB also determines the cylindrical uniformity of rods  
440 (Fig. 5). Specifically, a machine learning analysis (LASSO) of the correlations  
441 between MreB properties and rod shape revealed that a combination of  
442 modulating polymer number and total polymer length, along with the correct  
443 curvature localization is sufficient to accurately predict rod shape changes. While  
444 the LASSO analysis cannot distinguish whether MreB polymer number and total  
445 polymeric content (sum of the length of all polymers) directly impact cell shape or  
446 are correlates of other cellular processes, our result supports previous studies  
447 suggesting that MreB forms multiple independent structures distributed  
448 throughout the cylindrical portion of the cell<sup>1,5,12,13,25,26</sup>. Because both polymer  
449 number and total polymeric content are important, we predict neither one long  
450 polymer nor a multitude of small polymers are sufficient to generate cylindrically  
451 uniform cells. MreB senses local cell curvature and directs cell wall synthesis to  
452 those sites, which in turn locally changes cell shape. Thus, our data suggest that  
453 maintaining a rod shape with uniform diameter requires multiple MreB structures  
454 to make enough local shape measurements to direct the overall emergence of  
455 rod shape. In addition to promoting curvature sensing, long MreB structures  
456 could also distribute the area along which new cell wall material is being  
457 inserted<sup>4,14,27</sup>.

458 Our model for cylindrical uniformity predicts changes in cell shape ( $\Delta$ IDD)  
459 in a variety of backgrounds (mutations in both *mreB* and *rodZ*), and thus  
460 represents an additive model of cell shape. The fact that the aspects of MreB that  
461 predict cylindrical uniformity (polymer number, length, and curvature localization)  
462 are distinct from the aspect of MreB that predicts cell width (polymer angle)  
463 suggests that the absolute shape of the cell (width, straightness, uniformity, etc.)

464 is a complicated function where different cell shape properties can be tuned  
465 independently (Fig. 5). Thus, while MreB is emerging as a central coordinator of  
466 rod shape, there are other components downstream of MreB necessary to  
467 physically build the cell wall that are important for determining rod shape.  
468 Because RodZ influences both polymer number and MreB curvature localization,  
469 it will be important for future studies to unravel the specific contributions of  
470 curvature localization to the various aspects of rod shape formation.

471

472

- 473 1 Morgenstein, R. M. *et al.* RodZ links MreB to Cell Wall Synthesis to  
474 Mediate MreB rotation and Robust Morphogenesis. *Proc. Natl. Acad. Sci.*  
475 *USA*, (2015).
- 476 2 Billings, G. *et al.* De Novo Morphogenesis in L-Forms Via Geometric  
477 Control of Cell Growth. *Mol. Microbiol.* **93**, 883-896, (2014).
- 478 3 Cabeen, M. T. *et al.* Bacterial Cell Curvature Through Mechanical Control  
479 of Cell Growth. *The EMBO Journal* **28**, 1208-1219, (2009).
- 480 4 Ursell, T. S. *et al.* Rod-Like Bacterial Shape is Maintained by Feedback  
481 Between Cell Curvature and Cytoskeletal Localization. *Proc. Natl. Acad.*  
482 *Sci. USA* **111**, E1025-E1034, (2014).
- 483 5 Ouzounov, N. *et al.* MreB Orientation Correlates with Cell Diameter in  
484 *Escherichia coli*. *Biophys. J.* **111**, 1035-1043, (2016).
- 485 6 Wang, S. & Wingreen, Ned S. Cell Shape Can Mediate the Spatial  
486 Organization of the Bacterial Cytoskeleton. *Biophys. J.* **104**, 541-552,  
487 (2013).
- 488 7 Furchtgott, L., Wingreen, N. S. & Huang, K. C. Mechanisms for  
489 Maintaining Cell Shape in Rod-Shaped Gram-negative Bacteria. *Mol.*  
490 *Microbiol.* **81**, 340-353, doi:10.1111/j.1365-2958.2011.07616.x (2011).
- 491 8 de Pedro, M. A., Quintela, J. C., Höltje, J. V. & Schwarz, H. Murein  
492 Segregation in *Escherichia coli*. *J. Bacteriol.* **179**, 2823-2834,  
493 doi:10.1128/jb.179.9.2823-2834.1997 (1997).
- 494 9 Quint, David A., Gopinathan, A. & Grason, Gregory M. Shape Selection of  
495 Surface-Bound Helical Filaments: Biopolymers on Curved Membranes.  
496 *Biophys. J.* **111**, 1575-1585, (2016).
- 497 10 van den Ent, F., Izoré, T., Bharat, T. B., Johnson, C. M. & Lowe, J.  
498 Bacterial Actin MreB Forms AntiParallel Double Filaments. *eLife* **3** (2014).
- 499 11 Salje, J., van den Ent, F., de Boer, P. & Lowe, J. Direct Membrane Binding  
500 by Bacterial Actin MreB. *Mol. Cell* **43**, 478-487 (2011).
- 501 12 Bendezu, F. O., Hale, C. A., Bernhardt, T. G. & de Boer, P. A. J. RodZ  
502 (YfgA) is Required for Proper Assembly of the MreB Actin Cytoskeleton  
503 and Cell Shape in *E. coli*. *EMBO* **28**, 193-204 (2009).



- 504 13 van Teeffelen, S. *et al.* The Bacterial Actin MreB Rotates, and Rotation  
505 Depends on Cell-Wall Assembly. *Proc. Natl. Acad. Sci. USA* **108**, 15822-  
506 15827, (2011).
- 507 14 Wang, S., Furchtgott, L., Huang, K. C. & Shaevitz, J. W. Helical Insertion  
508 of Peptidoglycan Produces Chiral Ordering of the Bacterial Cell Wall.  
509 *Proc. Natl. Acad. Sci. USA* **109**, E595-E604, (2012).
- 510 15 Colavin, A., Hsin, J. & Huang, K. C. Effects of Polymerization and  
511 Nucleotide Identity on the Conformational Dynamics of the Bacterial Actin  
512 Homolog MreB. *Proc. Natl. Acad. Sci. USA* **111**, 3585-3590, (2014).
- 513 16 Masuda, H., Tan, Q., Awano, N., Wu, K.-P. & Inouye, M. YeeU Enhances  
514 the Bundling of Cytoskeletal Polymers of MreB and FtsZ, Antagonizing the  
515 CbtA (YeeV) Toxicity in *Escherichia coli*. *Mol. Microbiol.* **84**, 979-989,  
516 (2012).
- 517 17 Tan, Q., Awano, N. & Inouye, M. YeeV is an *Escherichia coli* Toxin that  
518 Inhibits Cell Division by Targeting the Cytoskeleton Proteins, FtsZ and  
519 MreB. *Mol. Microbiol.* **79**, 109-118, (2011).
- 520 18 Masuda, H., Tan, Q., Awano, N., Yamaguchi, Y. & Inouye, M. A Novel  
521 Membrane-bound Toxin for Cell Division, CptA (YgfX), Inhibits  
522 Polymerization of Cytoskeleton Proteins, FtsZ and MreB, in *Escherichia*  
523 *coli*. *FEMS Microbiol. Lett.* **328**, 174-181, (2012).
- 524 19 Alyahya, S. A. *et al.* RodZ, a Component of the Bacterial Core  
525 Morphogenic Apparatus. *Proc. Natl. Acad. Sci. USA* **106**, 1239-1244,  
526 doi:10.1073/pnas.0810794106 (2009).
- 527 20 van den Ent, F., Johnson, C. M., Persons, L., de Boer, P. & Lowe, J.  
528 Bacterial Actin MreB Assembles in Complex with Cell Shape Protein  
529 RodZ. *EMBO* **29**, 1081-1090 (2010).
- 530 21 Nguyen, J. P., Bratton, B. P. & Shaevitz, J. W. in *Bacterial Cell Wall*  
531 *Homeostasis: Methods and Protocols* (ed Hee-Jeon Hong) 227-245  
532 (Springer New York, 2016).
- 533 22 Shiomi, D., Sakai, M. & Niki, H. Determination of Bacterial Rod Shape by  
534 a Novel Cytoskeletal Membrane Protein. *The EMBO Journal* **27**, 3081-  
535 3091, (2008).
- 536 23 Shiomi, D. *et al.* Mutations in Cell Elongation Genes *mreB*, *mrdA* and  
537 *mrdB* Suppress the Shape Defect of RodZ-Deficient Cells. *Mol. Microbiol.*  
538 **87**, 1029-1044, (2013).
- 539 24 Tibshirani, R. Regression Shrinkage and Selection via the Lasso. *Journal*  
540 *of the Royal Statistical Society. Series B (Methodological)* **58**, 267-288  
541 (1996).
- 542 25 Garner, E. C. *et al.* Coupled, Circumferential Motions of the Cell Wall  
543 Synthesis Machinery and MreB Filaments in *B. subtilis*. *Science* **333**, 222-  
544 225, (2011).
- 545 26 Domínguez-Escobar, J. *et al.* Processive Movement of MreB-Associated  
546 Cell Wall Biosynthetic Complexes in Bacteria. *Science* **333**, 225-228,  
547 (2011).
- 548 27 Nguyen, L. T., Gumbart, J. C., Beeby, M. & Jensen, G. J. Coarse-grained  
549 Simulations of Bacterial Cell Wall Growth Reveal that Local Coordination

550 Alone can be Sufficient to Maintain Rod Shape. *Proc. Natl. Acad. Sci.*  
551 *USA* **112**, E3689-E3698 (2015).  
552 28 Chung, C. T., Niemela, S. L. & Miller, R. H. One-Step Preparation of  
553 Competent *Escherichia coli*: Transformation and Storage of Bacterial Cells  
554 in the Same Solution. *Proc. Natl. Acad. Sci. USA* **86**, 2172-2175 (1989).  
555 29 Bartlett, T. M. *et al.* A Periplasmic Polymer Curves *Vibrio cholerae* and  
556 Promotes Pathogenesis. *Cell* **168**, 172-185.e115 (2017).  
557  
558

559  
560

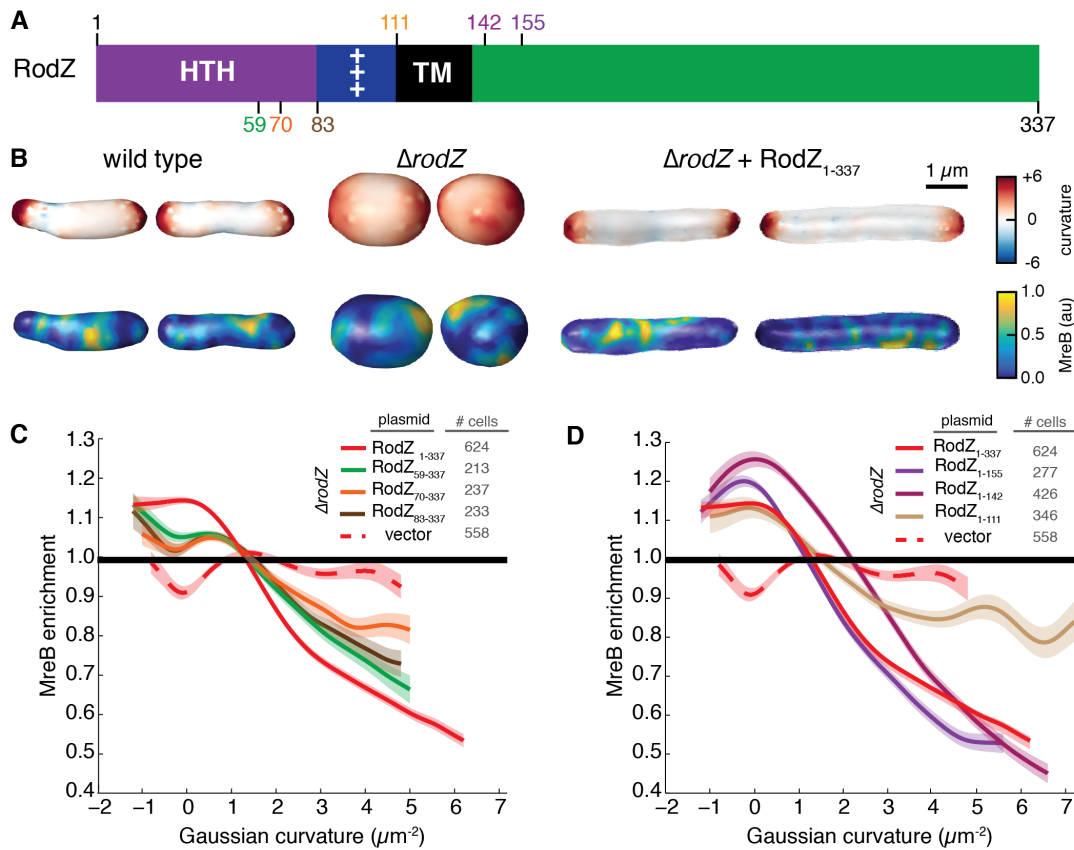

561  
562  
563  
564  
565  
566  
567  
568  
569  
570  
571  
572  
573  
574  
575  
576  
577  
578  
579  
580  
581  
582

**Figure 1.** The cytoplasmic domain of RodZ is necessary for MreB curvature localization. A) Schematic of RodZ's domain structure with location of truncations noted. B) 3D images of WT,  $\Delta rodZ$ , and  $rodZ$  complemented cells with Gaussian curvature and MreB fluorescence intensity represented. C) MreB enrichment plot of RodZ cytoplasmic truncations. D) MreB enrichment plot of RodZ periplasmic truncations. Shaded area indicates  $\pm 1$  standard error of the mean, and dotted lines indicate strains deleted of  $rodZ$ . The curve for each strain is a cubic smoothing spline and is truncated using a probability threshold for extreme curvatures of  $p > 5 \times 10^{-3}$  (Fig. S2A). Because the shape of each strain is different, the ranges of curvatures plotted for each strain are different.

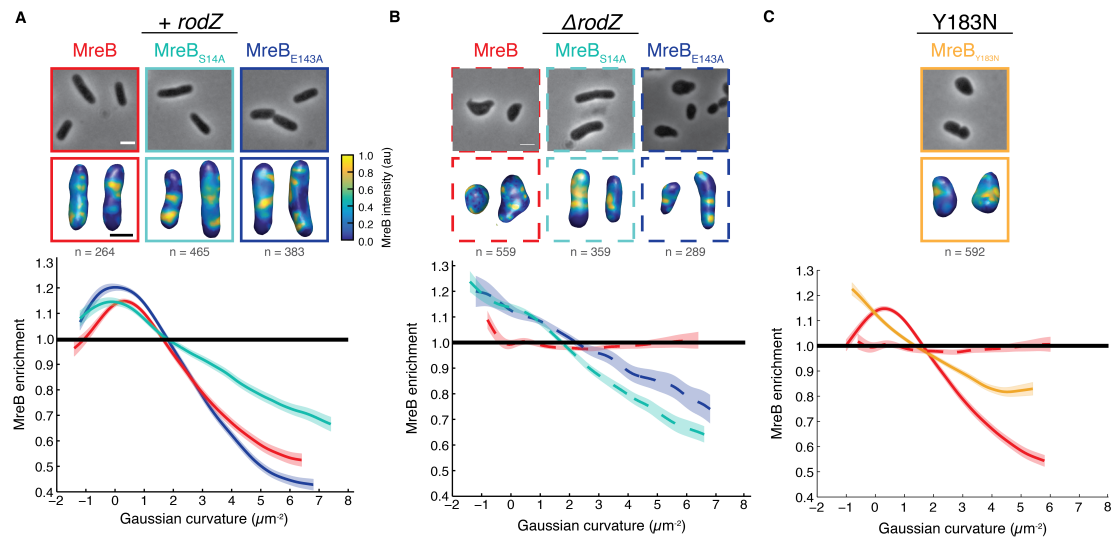

583

584 **Figure 2.** MreB curvature localization is necessary but not sufficient for rod  
585 shape. A) MreB enrichment curves of MreB point mutants with RodZ present. B)  
586 MreB enrichment curves of MreB point mutants in a *rodZ* deletion. C) MreB  
587 enrichment curve of MreB<sub>Y183N</sub>. Top images are 2D cells and bottom images are  
588 3D cells with MreB shown according to the color intensity scale in A. The number  
589 of independent cells that contributed to the enrichment plots is indicated in gray.  
590 Shaded areas of the curves indicate  $\pm 1$  standard error of the mean and dotted  
591 lines indicate strains deleted of *rodZ*. The curve for each strain is a cubic  
592 smoothing spline and is truncated using a probability threshold for extreme  
593 curvatures of  $p > 5 \times 10^{-3}$  (Fig. S3). Because the shape of each strain is different,  
594 the ranges of curvatures plotted for each strain are different. White scale bar for  
595 all phase images is 2  $\mu\text{m}$  and the black scale bar for all 3D reconstructions is 1  
596  $\mu\text{m}$ .

597

598

599

600

601

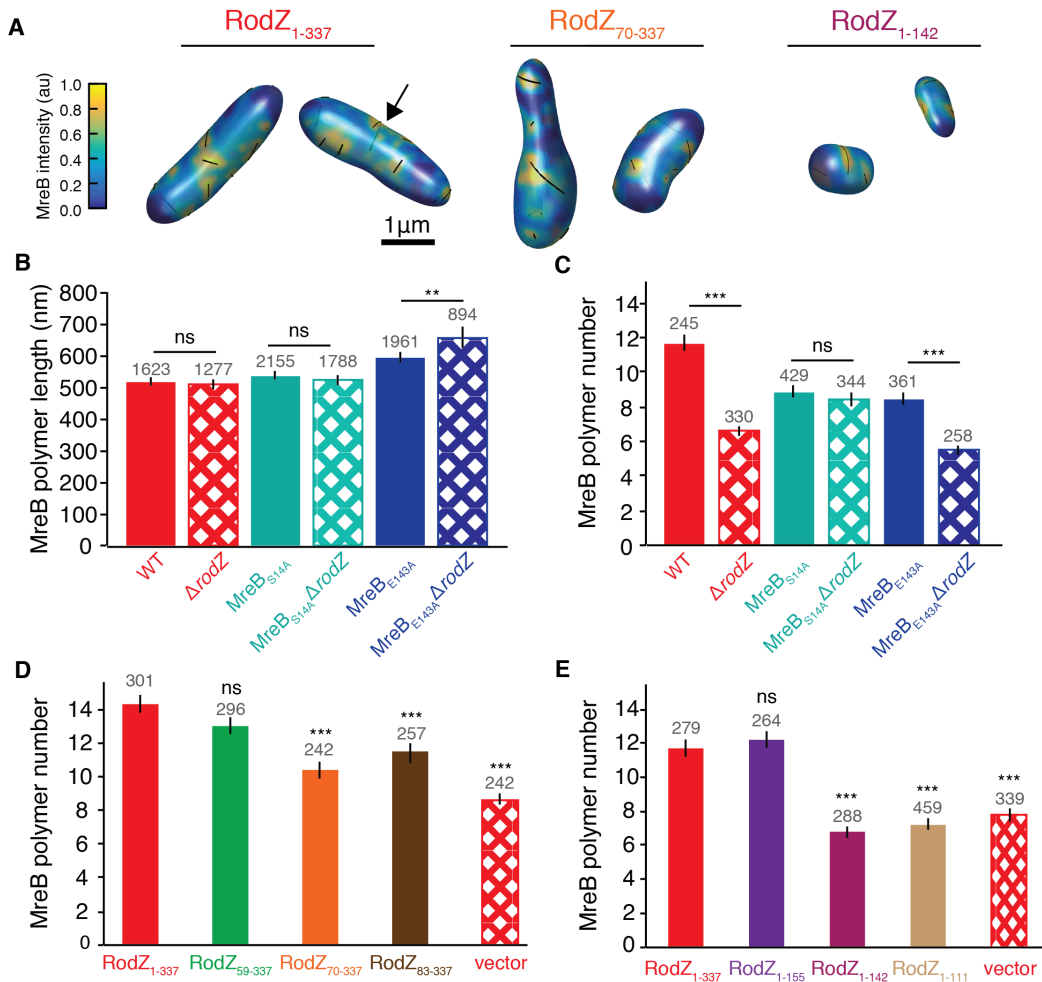

602

603 **Figure 3.** RodZ acts as an MreB assembly factor. A) Semi-transparent 3D  
604 renderings of cells with full-length or truncated RodZ as indicated. MreB  
605 polymers are indicated with black lines and may be present on the back of the  
606 cell where they appear less vividly black (see example at arrow). B) The average  
607 MreB polymer length (>200nm) per cell in different MreB point mutants in the  
608 presence and absence of *rodZ*. C) The average MreB polymer number per cell in  
609 different MreB point mutants in the presence and absence of *rodZ*. B-C) P-value  
610 comparisons are made between strains with similar MreB point mutations. For  
611 additional cross-comparisons see Table S3. D) The average MreB polymer  
612 number per cell in RodZ cytoplasmic truncation mutants. E) The average MreB  
613 polymer number per cell in RodZ periplasmic truncation mutants. D-E) P-value  
614 comparisons are made between indicated strain and a strain with full length  
615 RodZ (solid red bar). For other comparisons see Table S3. The number above  
616 the bars is the number of polymers (B) and the number of cells (C-E) analyzed.  
617 Error bars represent 95% confidence intervals. ns  $P > 0.05$ , \*\*  $P \leq 0.01$ , \*\*\*  $P \leq$   
618 0.001

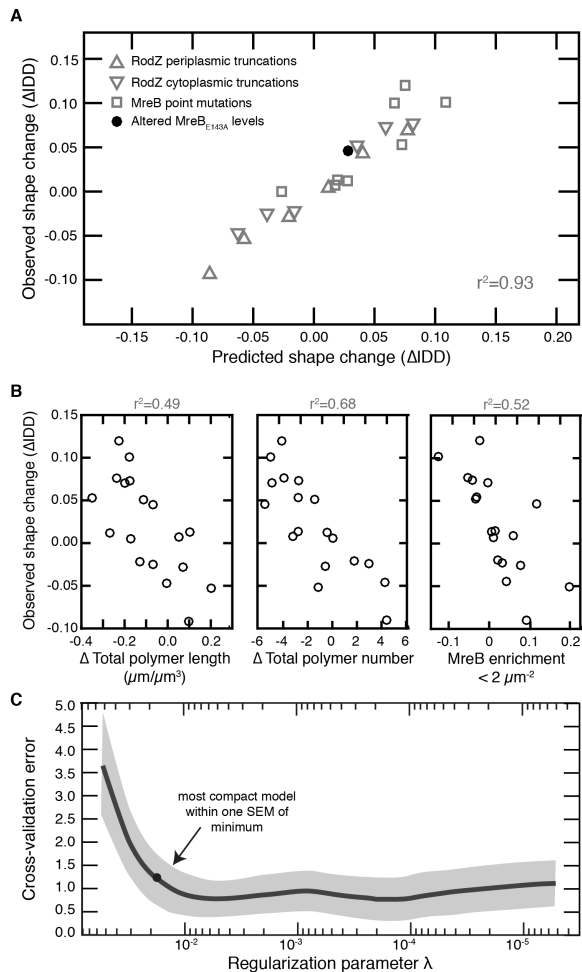

619  
 620  
 621  
 622  
 623  
 624  
 625  
 626  
 627  
 628  
 629  
 630  
 631  
 632  
 633  
 634  
 635  
 636  
 637

**Figure 4.** LASSO analysis reveals that rod shape requires many long and geometrically-localized MreB polymers. A) The correlation between observed and predicted cell shape when using the LASSO model combining parameters. See Table 1 for all the strains used and the observed and predicted IDD values. Note that to preserve its use as a test of the model, overexpression of MreB<sub>E143A</sub> was not used for model selection and training.  $r^2$  value represents the square of the Pearson correlation coefficient. B) Left- the correlation between observed and predicted cell shape when only using polymer length normalized by volume. Middle- the correlation between observed and predicted cell shape when only using polymer number. Right- the correlation between observed and predicted cell shape when only using average MreB enrichment at Gaussian curvatures below  $2 \mu\text{m}^2$ . C) The mean squared error (MSE) of 10-fold cross-validation as a function of the LASSO regularization parameter. The solid curve is the mean MSE and the shaded region represents one standard error of the mean. The dot represents the most compact model within one standard error of the mean from the minimum of the curve. See Table S2 for the coefficients in this model.

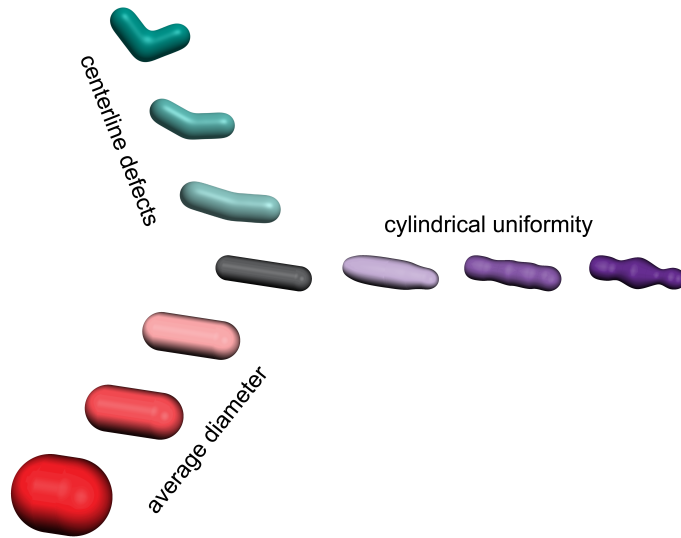

638  
639  
640  
641  
642  
643  
644  
645  
646  
647  
648  
649

**Figure 5.** Simple straight rod like cell shapes require multiple parameters to describe them. A straight rod is defined by its centerline curvature, cylindrical uniformity, and diameter. Deviations in any of these properties result in non-straight rods in extreme cases, and qualitatively ambiguous rods when only small changes occur. Teal- as centerline defects increase in magnitude cells become more bent until they are no longer straight. Purple- as cylindrical uniformity decreases cells exhibit increase fluctuations in their diameter along the long axis. Red- as width increases cells become more sphere like and less rod like. For each of these shape descriptors, a quantitative metric of shape provides a continuous rather than a binary description of rod vs non-rod.

650 Table 1: LASSO analysis of MreB's role in modulating cylindrical uniformity

651 ( $\Delta\text{IDD} = \text{IDD}_{\text{strain1}} - \text{IDD}_{\text{strain2}}$ )

|          |                                           | Strain 1                                                   | Strain 2                                                        | Predicted Shape Change | Observed Shape Change |  |
|----------|-------------------------------------------|------------------------------------------------------------|-----------------------------------------------------------------|------------------------|-----------------------|--|
| training | □                                         | $\Delta\text{rodZ}$                                        | WT                                                              | 0.109                  | 0.101                 |  |
|          | □                                         | $\Delta\text{rodZ} + \text{rodZ}$                          | WT                                                              | -0.022                 | 0.000                 |  |
|          | ∇                                         | $\Delta\text{rodZ} + \text{rodZ}_{59-337}$                 | $\Delta\text{rodZ} + \text{rodZ}$                               | 0.036                  | 0.051                 |  |
|          | ∇                                         | $\Delta\text{rodZ} + \text{rodZ}_{70-337}$                 | $\Delta\text{rodZ} + \text{rodZ}$                               | 0.082                  | 0.076                 |  |
|          | ∇                                         | $\Delta\text{rodZ} + \text{rodZ}_{83-337}$                 | $\Delta\text{rodZ} + \text{rodZ}$                               | 0.059                  | 0.073                 |  |
|          | Δ                                         | $\Delta\text{rodZ} + \text{rodZ}_{1-155}$                  | $\Delta\text{rodZ} + \text{rodZ}$                               | 0.012                  | 0.005                 |  |
|          | Δ                                         | $\Delta\text{rodZ} + \text{rodZ}_{1-142}$                  | $\Delta\text{rodZ} + \text{rodZ}$                               | 0.040                  | 0.045                 |  |
|          | Δ                                         | $\Delta\text{rodZ} + \text{rodZ}_{1-111}$                  | $\Delta\text{rodZ} + \text{rodZ}$                               | 0.077                  | 0.070                 |  |
|          |                                           |                                                            |                                                                 |                        |                       |  |
|          | □                                         | $\Delta\text{rodZ} + \text{pTrc99A}$                       | WT                                                              | 0.071                  | 0.098                 |  |
|          | ∇                                         | $\Delta\text{rodZ} + \text{rodZ}_{59-337}$                 | $\Delta\text{rodZ} + \text{pTrc99A}$                            | -0.062                 | -0.047                |  |
|          | ∇                                         | $\Delta\text{rodZ} + \text{rodZ}_{70-337}$                 | $\Delta\text{rodZ} + \text{pTrc99A}$                            | -0.016                 | -0.022                |  |
|          | ∇                                         | $\Delta\text{rodZ} + \text{rodZ}_{83-337}$                 | $\Delta\text{rodZ} + \text{pTrc99A}$                            | -0.039                 | -0.025                |  |
|          | Δ                                         | $\Delta\text{rodZ} + \text{rodZ}_{1-155}$                  | $\Delta\text{rodZ} + \text{pTrc99A}$                            | -0.086                 | -0.093                |  |
|          | Δ                                         | $\Delta\text{rodZ} + \text{rodZ}_{1-142}$                  | $\Delta\text{rodZ} + \text{pTrc99A}$                            | -0.057                 | -0.053                |  |
|          | Δ                                         | $\Delta\text{rodZ} + \text{rodZ}_{1-111}$                  | $\Delta\text{rodZ} + \text{pTrc99A}$                            | -0.020                 | -0.028                |  |
|          |                                           |                                                            |                                                                 |                        |                       |  |
|          | □                                         | MreB <sub>S14A</sub>                                       | WT                                                              | 0.020                  | 0.013                 |  |
|          | □                                         | MreB <sub>E143A</sub>                                      | WT                                                              | 0.017                  | 0.007                 |  |
| □        | MreB <sub>Y183N</sub>                     | WT                                                         | 0.075                                                           | 0.120                  |                       |  |
| □        | MreB <sub>S14A</sub> $\Delta\text{rodZ}$  | MreB <sub>S14A</sub>                                       | 0.028                                                           | 0.012                  |                       |  |
| □        | MreB <sub>E143A</sub> $\Delta\text{rodZ}$ | MreB <sub>E143A</sub>                                      | 0.072                                                           | 0.053                  |                       |  |
|          |                                           |                                                            |                                                                 |                        |                       |  |
| testing  | ●                                         | MreB <sub>E143A</sub> $\Delta\text{rodZ} + \text{pTrc99A}$ | MreB <sub>E143A</sub> $\Delta\text{rodZ} + \text{MreB}_{E143A}$ | 0.027                  | 0.045                 |  |

652 Table 1. A list of strains used to determine LASSO parameters. Predicted change  
 653 is the change in cell shape (IDD) that we predict from the regression model, while  
 654 measured shape change is taken from 3D measurements of cells.  $\Delta$ -RodZ  
 655 periplasmic truncations,  $\nabla$ -RodZ cytoplasmic truncations,  $\square$ -MreB point mutants  
 656 were strains used to determine the LASSO parameters. Grey circle- comparison  
 657 used to test the model.
